# Supplementary material
Source: HighWire-hosted journal article supplement (https://jech.bmj.com/content/77/5/328)
Supplement: inline-supplementary-material-1 [file inline-supplementary-material-1.pdf]

Supplementary Table. Other concerns about the COVID-19 reported by participants

|                                                                                     |
|-------------------------------------------------------------------------------------|
| “Want more scientific evidence/lack of clinical trials/RNA technology is new”       |
| “Worried that it won’t work in general”                                             |
| “Worried that mutated version of COVID will render effectiveness/COVID will mutate” |
| “Will wait for a year or so”                                                        |
| “Vaccine shot might hurt/afraid of needles”                                         |
| “Uncertain about the long-term effect on immune system/body/health etc.”            |
| “The manufacture [SIC] is not reliable”                                             |
| “Religious preference”                                                              |
| “Pregnancy”                                                                         |
| “RNA technology is new”                                                             |
| “Prefer body’s own production of antigen”                                           |
| “Hx <sup>1</sup> of allergic reaction to vaccine”                                   |
| “Conspiracy theory – ‘vaccine is created to kill of the vast population’”           |
| “Do not belief the existence of COVID or its consequences or its lethality”         |
| “Affordability – ‘I can’t afford it’”                                               |

<sup>1</sup>History
